# Supplementary material for: Plastomeric-like polyethylenes achievable using thermally robust N,N′-nickel catalysts appended with electron withdrawing difluorobenzhydryl and nitro groups
Source: Royal Society of Chemistry journal article supplement (doi:10.1039/c8dt04427a), 2018-12-26
Supplement: c8dt04427a1.pdf [file c8dt04427a1.pdf]

Supporting information

**Plastomeric-like polyethylenes achievable using thermally robust *N,N'*-nickel catalysts appended with electron withdrawing difluorobenzhydryl and nitro groups**

Randi Zhang,<sup>a,b</sup> Zheng Wang,<sup>a,b</sup> Yanping Ma,<sup>a,b</sup> Gregory A. Solan,<sup>\*,a,c</sup> Yang Sun,<sup>a</sup> Wen-Hua Sun<sup>\*,a,b,d</sup>

<sup>a</sup> Key Laboratory of Engineering Plastics and Beijing National Laboratory for Molecular Sciences, Institute of Chemistry, Chinese Academy of Sciences, Beijing 100190, China.

<sup>b</sup> CAS Research/Education Center for Excellence in Molecular Sciences, University of Chinese Academy of Sciences, Beijing 100049, China.

<sup>c</sup> Department of Chemistry, University of Leicester, University Road, Leicester LE1 7RH, UK.

<sup>d</sup> State Key Laboratory for Oxo Synthesis and Selective Oxidation, Lanzhou Institute of Chemical Physics, Chinese Academy of Sciences, Lanzhou 730000, China.

**Contents**

1. **Figure S1.** Dimerization of Ni3(OH2) through OH...Br intermolecular hydrogen-bonding interactions
2. **Figure S2.** GPC curves of the polyethylenes obtained using Ni1/EASC at different Al:Ni ratios (entries 1 – 6, Table 3).
3. **Figure S3.** GPC curves of the polyethylenes obtained using Ni1/EASC at different reaction temperatures (entries 4, 7 – 11, Table 3).
4. **Figure S4.** GPC curves of the polyethylenes obtained using Ni1/EASC over different reaction times (entries 9 and 12 – 14, Table 3).
5. **Figure S5.** GPC curves of the polyethylenes obtained using Ni1/MAO at different Al:Ni molar ratios (entries 1 – 5, Table 4).
6. **Figure S6.** GPC curves of the polyethylenes obtained using Ni1/MAO at different reaction temperatures (entries 3 and 6 – 9, Table 4).
7. **Figure S7.** GPC curves of the polyethylenes obtained using Ni1/MAO at different reaction times (entries 3 and 10 – 12, Table 4).
8. **Figure S8.** <sup>13</sup>C NMR spectrum of PE-50<sub>E/Ni1</sub> obtained using Ni1/EASC at 50 °C (entry 7, Table 3).
9. **Figure S9.** <sup>13</sup>C NMR spectrum of PE-60<sub>M/Ni1</sub> obtained using Ni1/MAO at 60 °C (entry 9, Table 4).
10. **Table S1.** Variation in the polyethylene properties as a function of the precatalyst structure; MAO activation<sup>a</sup>
11. **Table S2.** Crystal data and structural refinements for L3, Ni3 and Ni4.

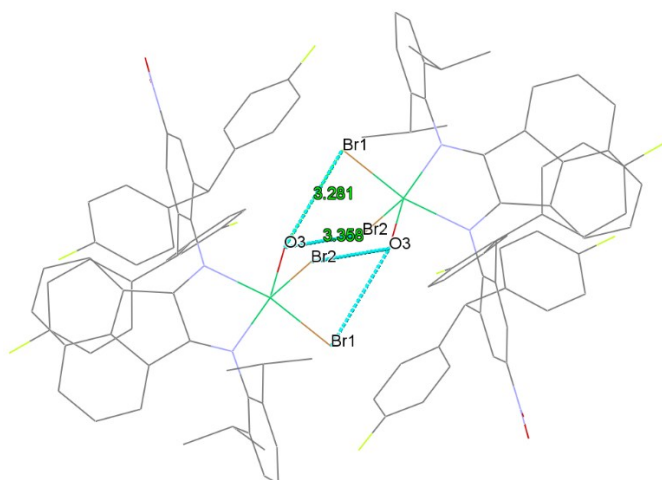

**Figure S1.** Dimerization of Ni<sub>3</sub>(OH)<sub>2</sub> through OH···Br intermolecular hydrogen-bonding interactions.

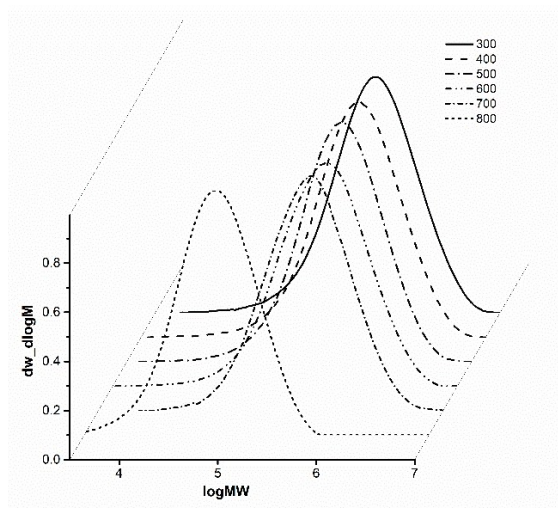

**Figure S2.** GPC curves of the polyethylenes obtained using Ni<sub>1</sub>/EASC at different Al:Ni ratios (entries 1 – 6, Table 3).

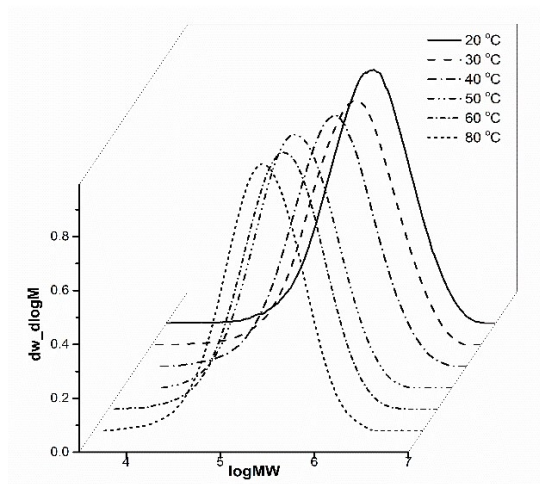

**Figure S3.** GPC curves of the polyethylenes obtained using Ni<sub>1</sub>/EASC at different reaction temperatures (entries 4, 7 – 11, Table 3).

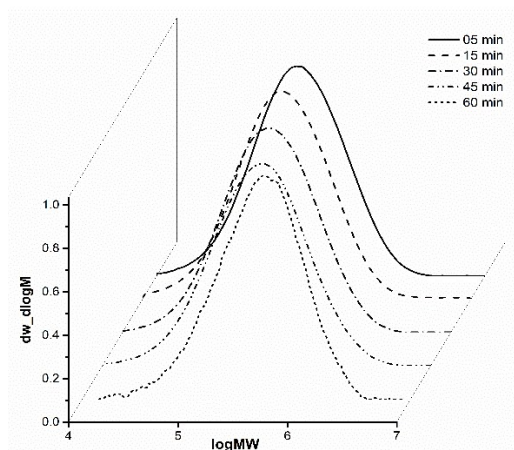

**Figure S4.** GPC curves of the polyethylenes obtained using **Ni1/EASC** over different reaction times (entries 9 and 12 – 14, Table 3).

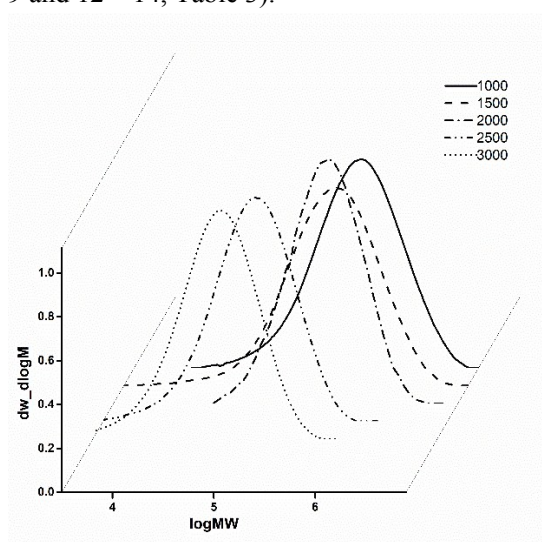

**Figure S5.** GPC curves of the polyethylenes obtained using **Ni1/MAO** at different Al:Ni molar ratios (entries 1 – 5, Table 4).

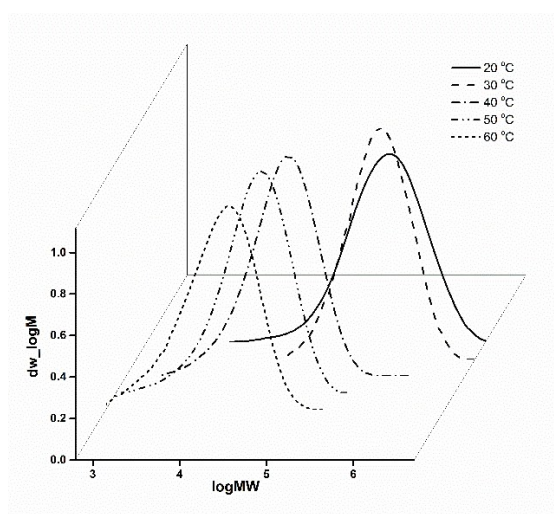

**Figure S6.** GPC curves of the polyethylenes obtained using **Ni1/MAO** at different reaction temperatures (entries 3 and 6 – 9, Table 4).

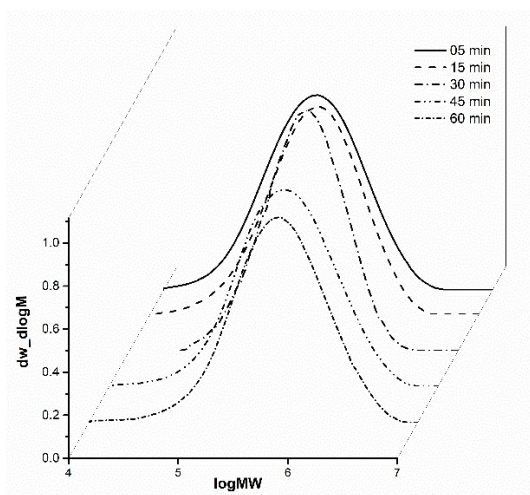

**Figure S7.** GPC curves of the polyethylenes obtained using NiI/MAO at different reaction times (entries 3 and 10 – 12, Table 4).

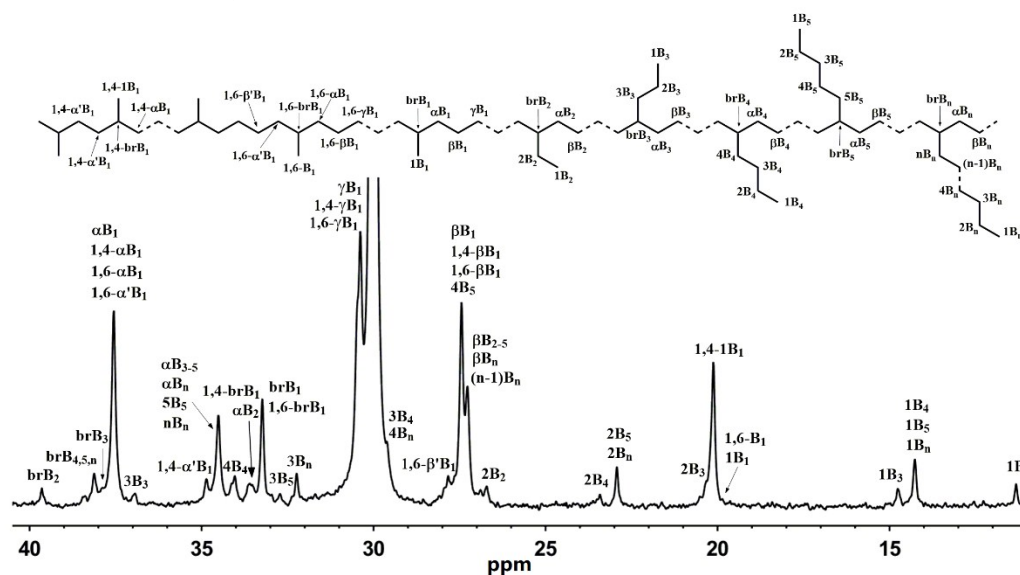

**Figure S8.**  $^{13}\text{C}$  NMR spectrum of PE-50<sub>E</sub>/NiI obtained using NiI/EASC at 50 °C (entry 7, Table 3).

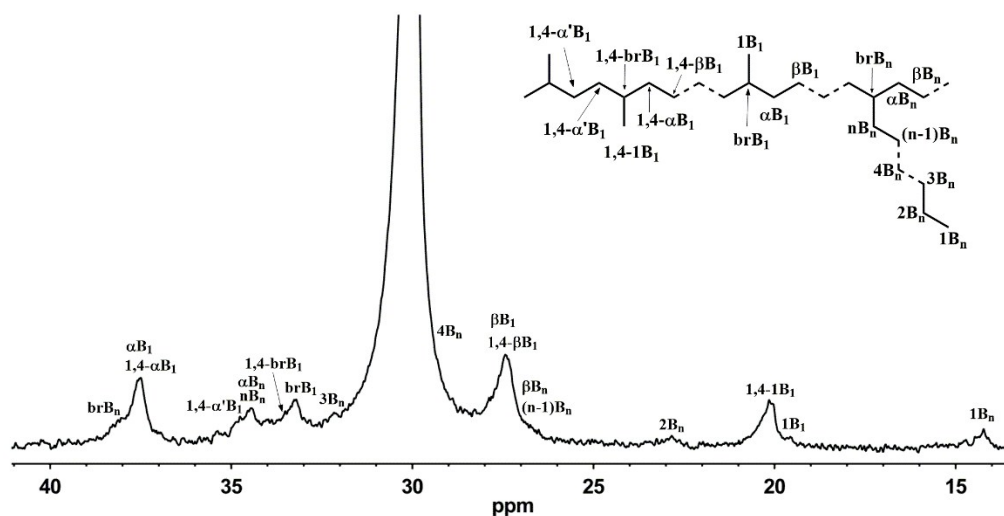

**Figure S9.**  $^{13}\text{C}$  NMR spectrum of PE-60<sub>M</sub>/NiI obtained using NiI/MAO at 60 °C (entry 9, Table 4).

**Table S1.** Variation in the polyethylene properties as a function of the precatalyst structure; all polymerization runs performed with MAO activation<sup>a</sup>

| Precatalyst                                                                                                      | Temp /°C | Activity <sup>b</sup> | $M_w^c$ | $M_w/M_n^c$ |
|------------------------------------------------------------------------------------------------------------------|----------|-----------------------|---------|-------------|
| 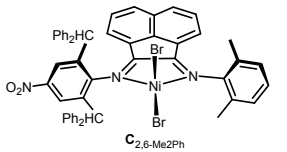<br>C <sub>2,6-Me2Ph</sub>      | 20       | 1.32                  | 24.10   | 1.4         |
| <br>D <sub>Me/2,4,6-Me3Ph</sub> | 30       | 8.73                  | 4.33    | 1.8         |
| <br>D <sub>F/2,4,6-Me3Ph</sub>  | 30       | 12.48                 | 4.81    | 2.1         |
| <br>Ni <sub>4</sub>            | 30       | 5.12                  | 8.21    | 3.0         |

<sup>a</sup> 10 atm C<sub>2</sub>H<sub>4</sub>; toluene as solvent and MAO as co-catalyst; <sup>b</sup> Values in units of 10<sup>6</sup> g (PE) mol<sup>-1</sup> (Ni) h<sup>-1</sup>; <sup>c</sup> Determined by GPC,  $M_w$ : 10<sup>5</sup> g mol<sup>-1</sup>.

**Table S2.** Crystal data and structural refinements for **L3**, **Ni3** and **Ni4**.

|                                              | <b>L3</b>                                                                    | <b>Ni3(OH<sub>2</sub>)</b>                                                                     | <b>Ni4</b>                                                                                     |
|----------------------------------------------|------------------------------------------------------------------------------|------------------------------------------------------------------------------------------------|------------------------------------------------------------------------------------------------|
| Empirical formula                            | C <sub>56</sub> H <sub>43</sub> F <sub>4</sub> N <sub>3</sub> O <sub>2</sub> | C <sub>56</sub> H <sub>45</sub> Br <sub>2</sub> F <sub>4</sub> N <sub>3</sub> NiO <sub>3</sub> | C <sub>53</sub> H <sub>37</sub> Br <sub>2</sub> F <sub>4</sub> N <sub>3</sub> NiO <sub>2</sub> |
| Formula weight                               | 865.93                                                                       | 1102.48                                                                                        | 1042.38                                                                                        |
| Temperature/K                                | 173.15                                                                       | 173.15                                                                                         | 173.15                                                                                         |
| Wavelength/Å                                 | 0.71073                                                                      | 0.71073                                                                                        | 0.71073                                                                                        |
| Crystal system                               | monoclinic                                                                   | monoclinic                                                                                     | monoclinic                                                                                     |
| Space group                                  | <i>P2</i> <sub>1</sub> / <i>c</i>                                            | <i>P2</i> <sub>1</sub> / <i>n</i>                                                              | <i>P2</i> <sub>1</sub> / <i>c</i>                                                              |
| <i>a</i> /Å                                  | 11.3537(4)                                                                   | 11.3027(3)                                                                                     | 14.652(3)                                                                                      |
| <i>b</i> /Å                                  | 23.9312(6)                                                                   | 32.3842(7)                                                                                     | 32.546(7)                                                                                      |
| <i>c</i> /Å                                  | 17.2928(5)                                                                   | 15.9132(4)                                                                                     | 10.810(2)                                                                                      |
| Alpha/°                                      | 90                                                                           | 90                                                                                             | 90                                                                                             |
| Beta/°                                       | 105.819(3)                                                                   | 108.872(3)                                                                                     | 95.61(3)                                                                                       |
| Gamma/°                                      | 90                                                                           | 90                                                                                             | 90                                                                                             |
| Volume/Å <sup>3</sup>                        | 4520.6(2)                                                                    | 5511.6(3)                                                                                      | 5130.0(18)                                                                                     |
| <i>Z</i>                                     | 4                                                                            | 4                                                                                              | 4                                                                                              |
| $D_{\text{calcd}}/(\text{g}/\text{cm}^{-3})$ | 1.272                                                                        | 1.329                                                                                          | 1.350                                                                                          |
| $\mu/\text{mm}^{-1}$                         | 0.089                                                                        | 1.858                                                                                          | 1.991                                                                                          |
| <i>F</i> (000)                               | 17628.0                                                                      | 2240.0                                                                                         | 2104.0                                                                                         |
| Crystal size/mm <sup>3</sup>                 | 0.160 × 0.147 × 0.042                                                        | 0.308 × 0.164 × 0.132                                                                          | 0.243 × 0.156 ×                                                                                |

|                                                      |                      |                      |                      |
|------------------------------------------------------|----------------------|----------------------|----------------------|
|                                                      |                      |                      | 0.102                |
| $\theta$ range ( $^{\circ}$ )                        | 2.982 to 63.074      | 2.982 to 63.12       | 2.502 to 54.934      |
|                                                      | $-16 \leq h \leq 16$ | $-15 \leq h \leq 16$ | $-18 \leq h \leq 19$ |
| Limiting indices                                     | $-34 \leq k \leq 35$ | $-45 \leq k \leq 47$ | $-42 \leq k \leq 42$ |
|                                                      | $-25 \leq l \leq 25$ | $-23 \leq l \leq 22$ | $-14 \leq l \leq 14$ |
| No. of rflns collected                               | 60972                | 92431                | 69720                |
| No. unique rflns                                     | 14101                | 17353                | 11709                |
| $R_{\text{int}}$                                     | 0.0798               | 0.1041               | 0.0691               |
| No. of params                                        | 590                  | 627                  | 589                  |
| Completeness to $\theta$                             | 93.4                 | 94.1                 | 99.7                 |
| Goodness of fit on $F^2$                             | 1.013                | 1.038                | 1.211                |
| Final $R$ indexes                                    | $R_1 = 0.0715$       | $R_1 = 0.0700$       | $R_1 = 0.0772$       |
| $[I > 2\sigma(I)]$                                   | $wR_2 = 0.1279$      | $wR_2 = 0.1595$      | $wR_2 = 0.1558$      |
| Final $R$ indexes (all data)                         | $R_1 = 0.1588$       | $R_1 = 0.1413$       | $R_1 = 0.0840$       |
|                                                      | $wR_2 = 0.1562$      | $wR_2 = 0.1849$      | $wR_2 = 0.1614$      |
| Largest diff. peak and hole/( $e \text{ \AA}^{-3}$ ) | 0.32/-0.25           | 1.24/-0.68           | 1.21/-0.51           |

---
